# Supplementary material for: Silk-derived carbon nanosheets for transparent conducting electrodes on flexible substrates
Source: Royal Society of Chemistry journal article supplement (doi:10.1039/d5tc03917g), 2025-12-29
Supplement: d5tc03917g1.pdf [file d5tc03917g1.pdf]

# Electronic Supplementary Information

## Silk-Derived Carbon Nanosheets for Transparent Conducting Electrodes on Flexible Substrates

Se Youn Cho,<sup>a,b</sup> Moataz Abdulhafez,<sup>a</sup> Golnaz Najaf Tomaraei,<sup>a</sup> Jaegeun Lee,<sup>a,c</sup> and Mostafa Bedewy<sup>\*,a,d,e</sup>

---

<sup>a</sup> Department of Industrial Engineering, University of Pittsburgh, Pittsburgh, Pennsylvania 15261, United States

<sup>b</sup> RAMP Convergence Research Center, Korea Institute of Science and Technology, 92 Chudong-ro, Bongdong-eup, Wanju-gun, Jeonbuk 55324, Republic of Korea

<sup>c</sup> School of Chemical Engineering, Pusan National University, Busan 46241, Republic of Korea

<sup>d</sup> Department of Mechanical Engineering and Materials Science, University of Pittsburgh, Pittsburgh, Pennsylvania 15261, United States

<sup>e</sup> Department of Chemical and Petroleum Engineering, University of Pittsburgh, Pittsburgh, Pennsylvania 15261, United States

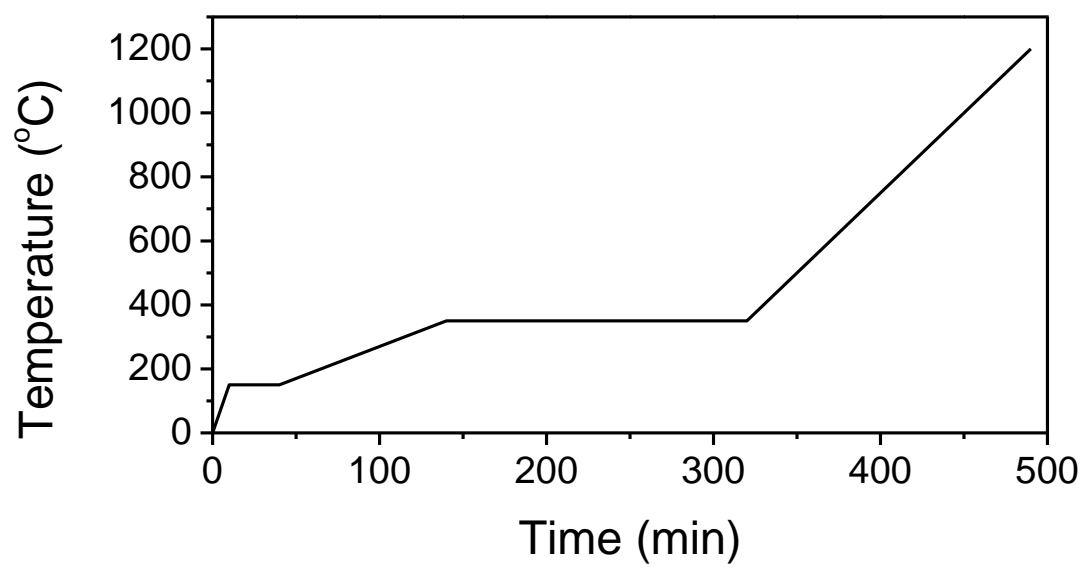

**Figure S1.** Temperature schedule of carbonization process for silk fibroin-based carbon nanosheets.

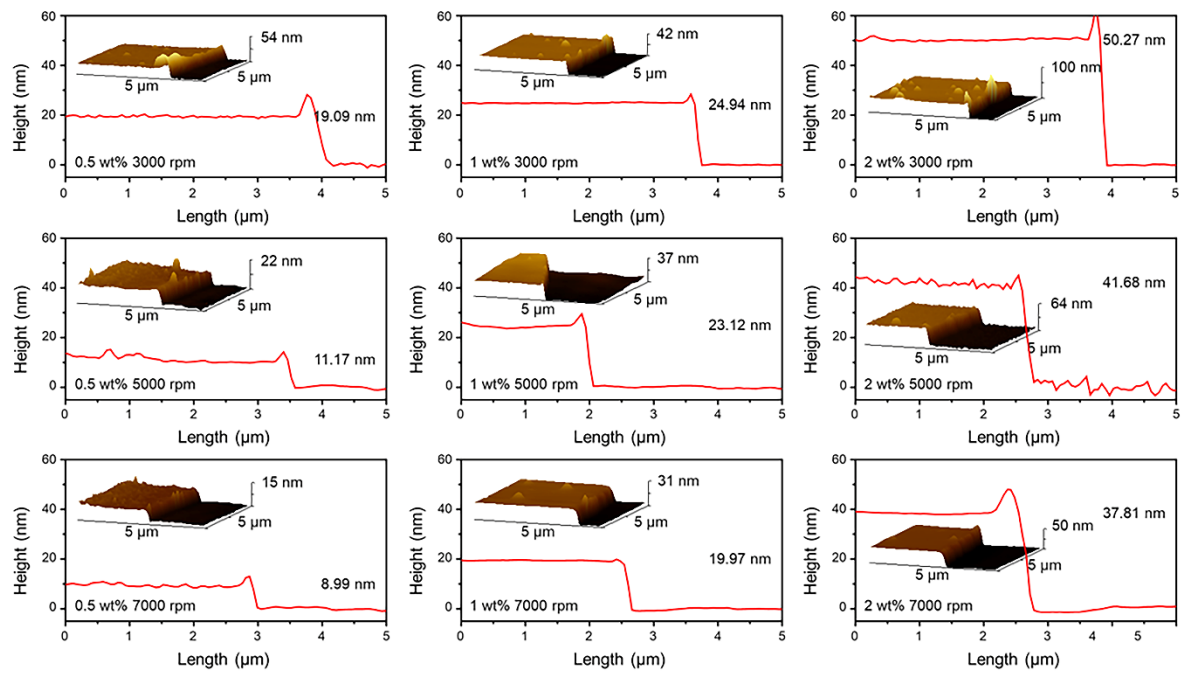

**Figure S2.** AFM images showing thickness dependence of the silk fibroin thin film on the spin rates and the concentrations of silk fibroin.

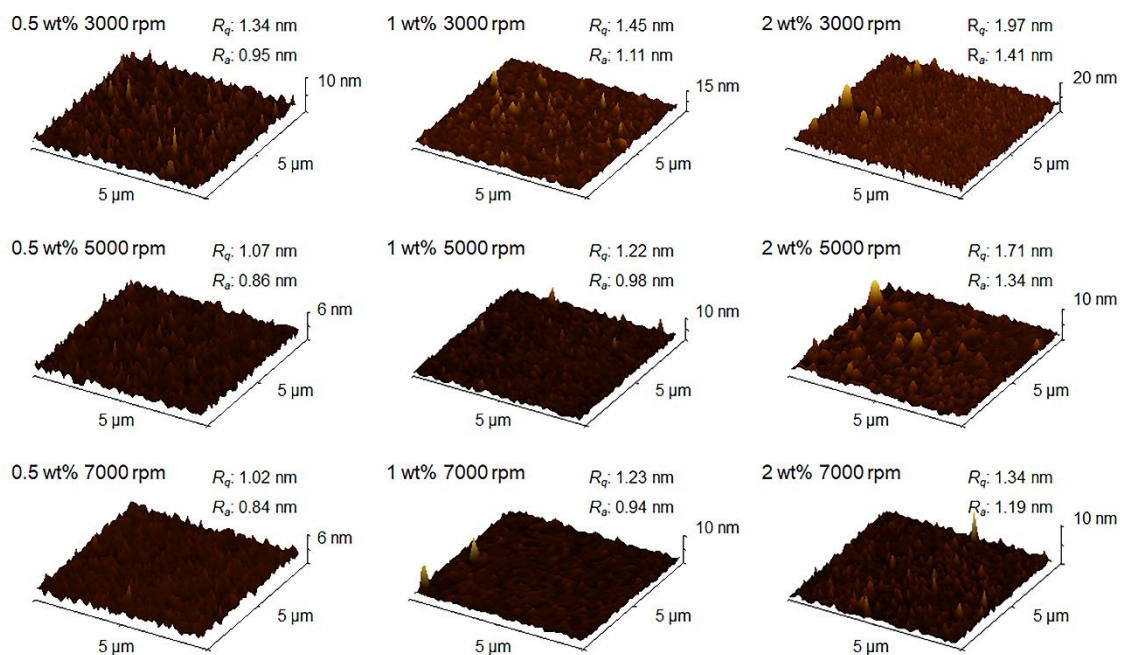

**Figure S3.** 3D AFM topography images showing the surface roughness of silk fibroin films prepared at different solution concentrations (0.5–2.0 wt.%) and spin-coating speeds (1000–7000 rpm).  $R_a$  values correspond to  $5 \times 5 \mu\text{m}$  scan areas on  $\text{SiO}_2/\text{Si}$  substrates.

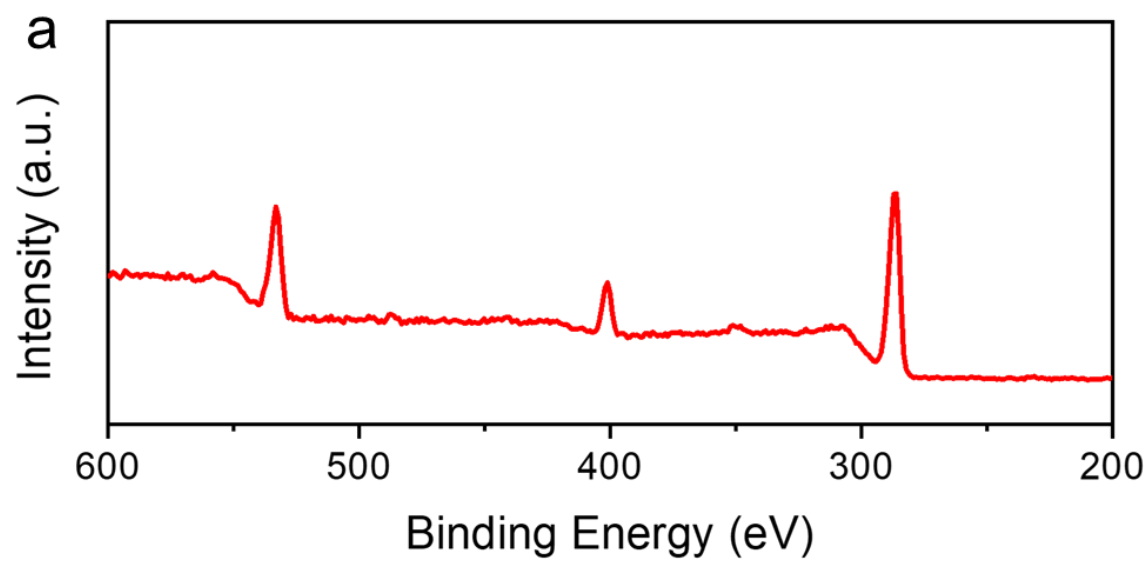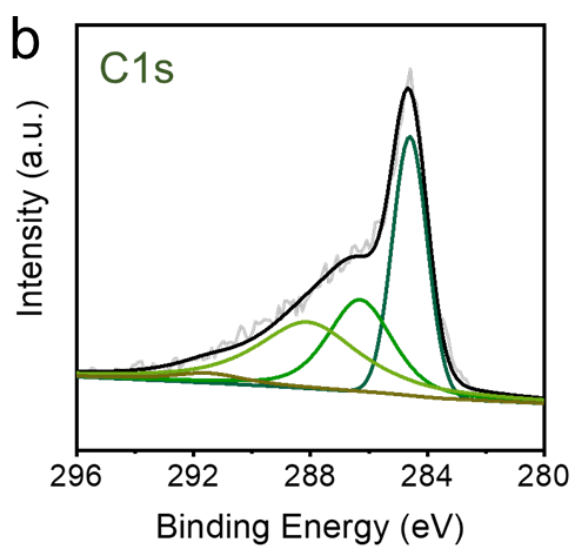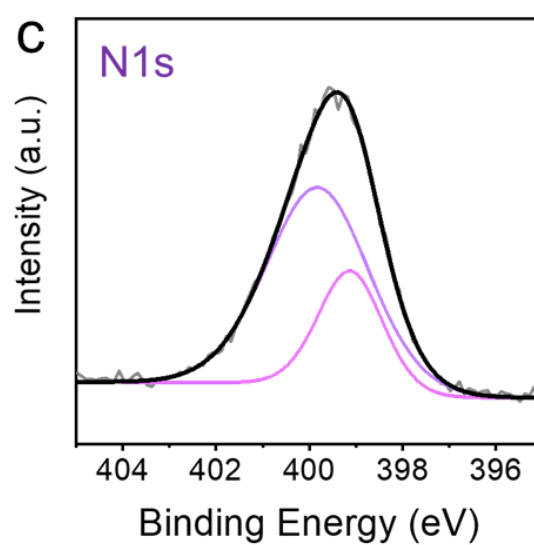

**Figure S4.** (a) XPS survey spectra of regenerated silk fibroin, and deconvoluted high-resolution spectra of (b) C1s and (c) N1s.

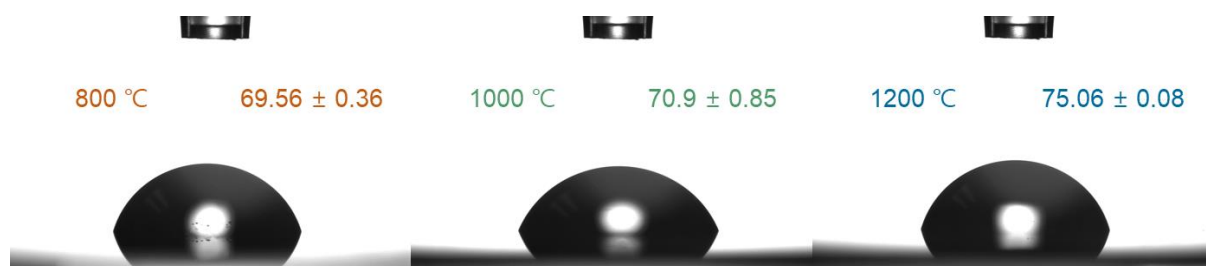

**Figure S5.** Contact angle of a water droplet on the surface of silk fibroin-derived carbon nanosheets prepared with different temperature.

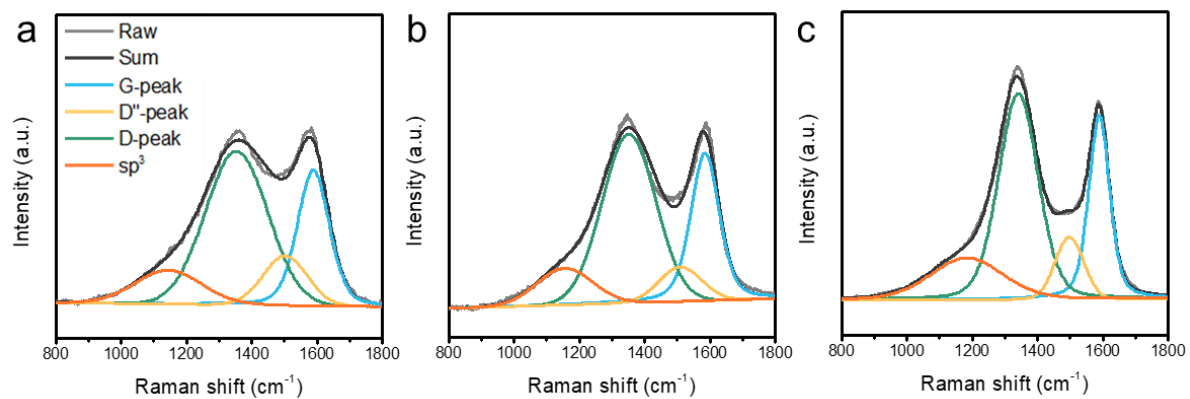

**Figure S6.** Deconvoluted Raman spectra of SF-derived carbon nanosheets heat-treated at (a) 800 °C, (b) 1,000 °C, and (c) 1,200 °C.

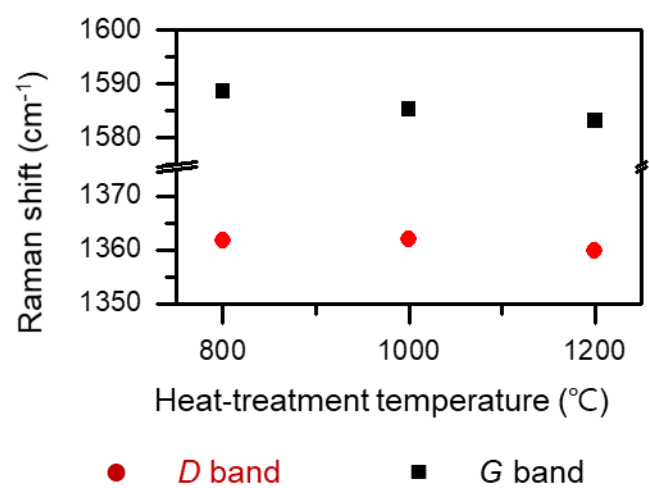

**Figure S7.** Position of *D* and *G* bands of silk fibroin-based CNs according to heat-treatment temperature.



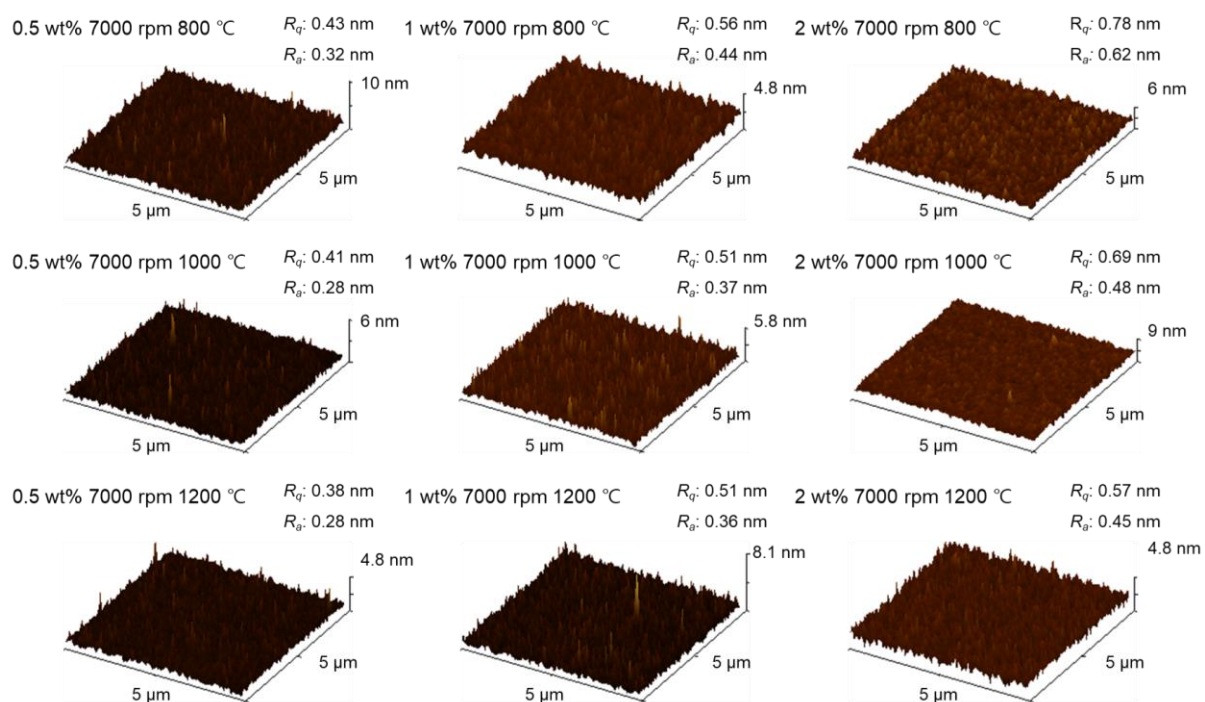

**Figure S8.** Surface roughness of silk fibroin-derived carbon nanosheet films with different concentration and HTT.

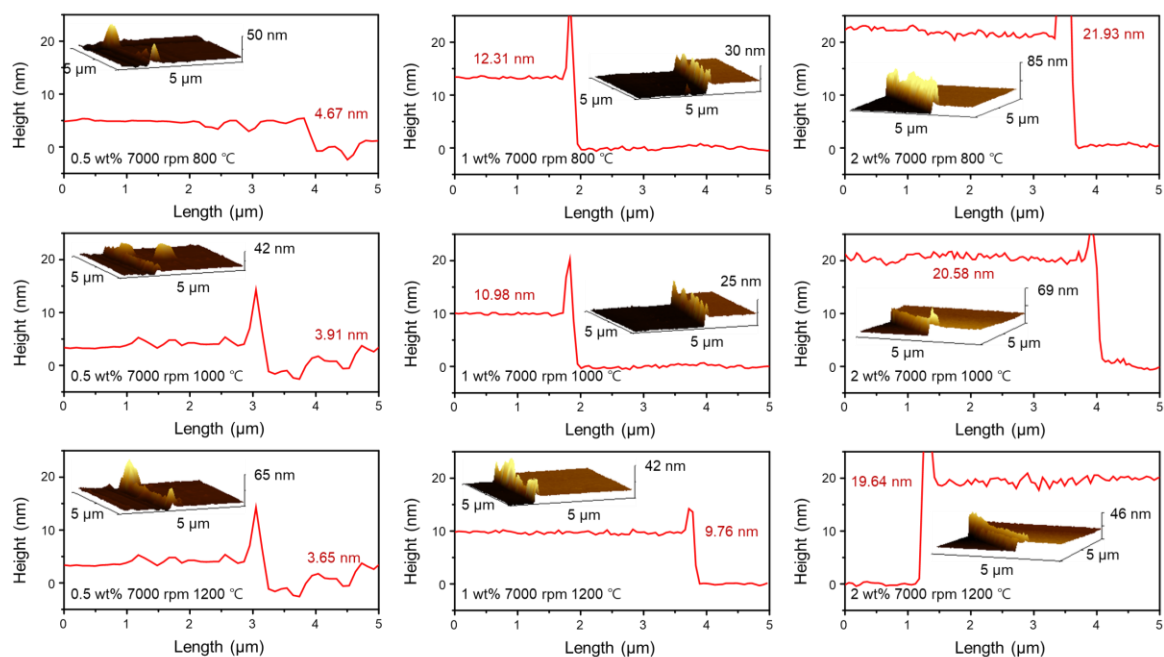

**Figure S9.** AFM images and thickness of carbonized silk fibroin thin films prepared using different concentration and HTT

**Table S1.** Elemental composition and chemical structure of regenerated SF by XPS Analysis

| Element | Binding Energy | Assignment | Atomic Fraction by XPS | Atomic Fraction by theoretical Calculation* |
|---------|----------------|------------|------------------------|---------------------------------------------|
| C 1s    | 284.6 eV       | C-C, C-H   | 0.64                   | 0.55                                        |
|         | 285.9 eV       | C-N        |                        |                                             |
|         | 288.2 eV       | O=C-N      |                        |                                             |
| O 1s    | 531.0 eV       | O in amide | 0.21                   | 0.24                                        |
| N 1s    | 398.50 eV      | N in amide | 0.15                   | 0.21                                        |

\*Data calculated from the 10 main amino acid residue (Gly, Ala, Ser, Try, Val, Asp/Asn, Thr Glu/Gln, Phe, and lie) known as comprising 98.1% of the total composition of silk fibroin

**Table S1.** Comparison of representative carbon-based transparent conductive films, including graphene-, CNT-, and polymer-derived carbon nanosheets, highlighting their transmittance at 550 nm and sheet resistance values

| Material                       | Transmittance @ 550 nm (%) | Sheet Resistance ( $\Omega/\text{sq}$ ) | Ref.      |
|--------------------------------|----------------------------|-----------------------------------------|-----------|
| single-layer graphene film     | 89.0~96.5                  | 300~11200                               | S1        |
| bilayer graphene film          | 83.0~94.7                  | 180~500                                 | S1        |
| graphene/polymer nanocomposite | >90                        | ~15                                     | S2        |
| carbon-welded SWCNT            | >90                        | 41                                      | S3        |
| CNT–PAA hybrid                 | 91/84                      | 150/60                                  | S4        |
| polyimide-derived CNSs         | 54~89                      | 1600~14700                              | S5        |
| polyethylene-derived CNSs      | 80~90                      | $10^2\sim 10^3$                         | S6        |
| Nitrogen-containing oligomers  |                            | 100-2000                                | S7        |
| PAN-derived CNSs               | 80~90                      | $10^2\sim 10^3$                         | S8        |
| CNS from silk (this work)      | >98                        | $\sim 10^2$                             | This work |

## References

- S1. S. Lee, K. Lee, C. H. Liu, and Z. Zhong, *Nanoscale*, 2012, 4(2), 639-644.
- S2. C. Biswas, I. Candan, Y. Alaskar, H. Qasem, W. Zhang, A. Z. Stieg, Y.-H. Xiw, and K. L. Wang, *Sci. rep.*, 2018, 8, 10259.
- S3. S. Jiang, P. X. Hou, M. L. Chen, B. W. Wang, D. M. Sun, D. M. Tang, Q. Jin, Q.-X. Guo, D.-D. Zhang, K.-P. Tai, J. Tan, E. O. Kauppinen, C. Lui, and H.-M. Cheng, *Sci. adv.*, 2018, 4(5), eaap9264.
- S4. Y. Zhou, R. Azumi, and S. Shimada, *Nanoscale*, 2019, 11(9), 3804-3813.
- S5. G. Souri, S. J. Yu, H. Yeo, M. Goh, J.-Y. Hwang, S. M. Kim, B.-C. Ku, Y. G. Jeong, and N.-H. You, *RSC Adv.*, 2016, 6(58), 52509-52517.
- S6. M. Yi, M. Han, J. Chen, Z. Hao, Y. Chen, Y. Yao, and R. Sun, *Nanomaterials*, 2021, 12(1), 111.
- S7. K. K. Chung, N. Fechner, M. Patrini, P. Galinetto, D. Comoretto, and M. Antonietti, *Carbon*, 2015, 94, 1044-1051.
- S8. S. I. Na, Y. J. Noh, S. Y. Son, T. W. Kim, S. S. Kim, S. Lee, and H. I. Joh, *Appl. Phys. Lett.*, 2013, 102(4).
